# Supplementary figures and images for: A myriad of miRNA variants in control and Huntington’s disease brain regions detected by massively parallel sequencing
Source: PubMed Central journal article supplement — Nucleic Acids Res. 2010 Jun 30;38(20):7219–35. doi: 10.1093/nar/gkq575 (PMC2978354; doi:10.1093/nar/gkq575), 2010-06-30

# Figure S5

## Huntington's Disease Signaling

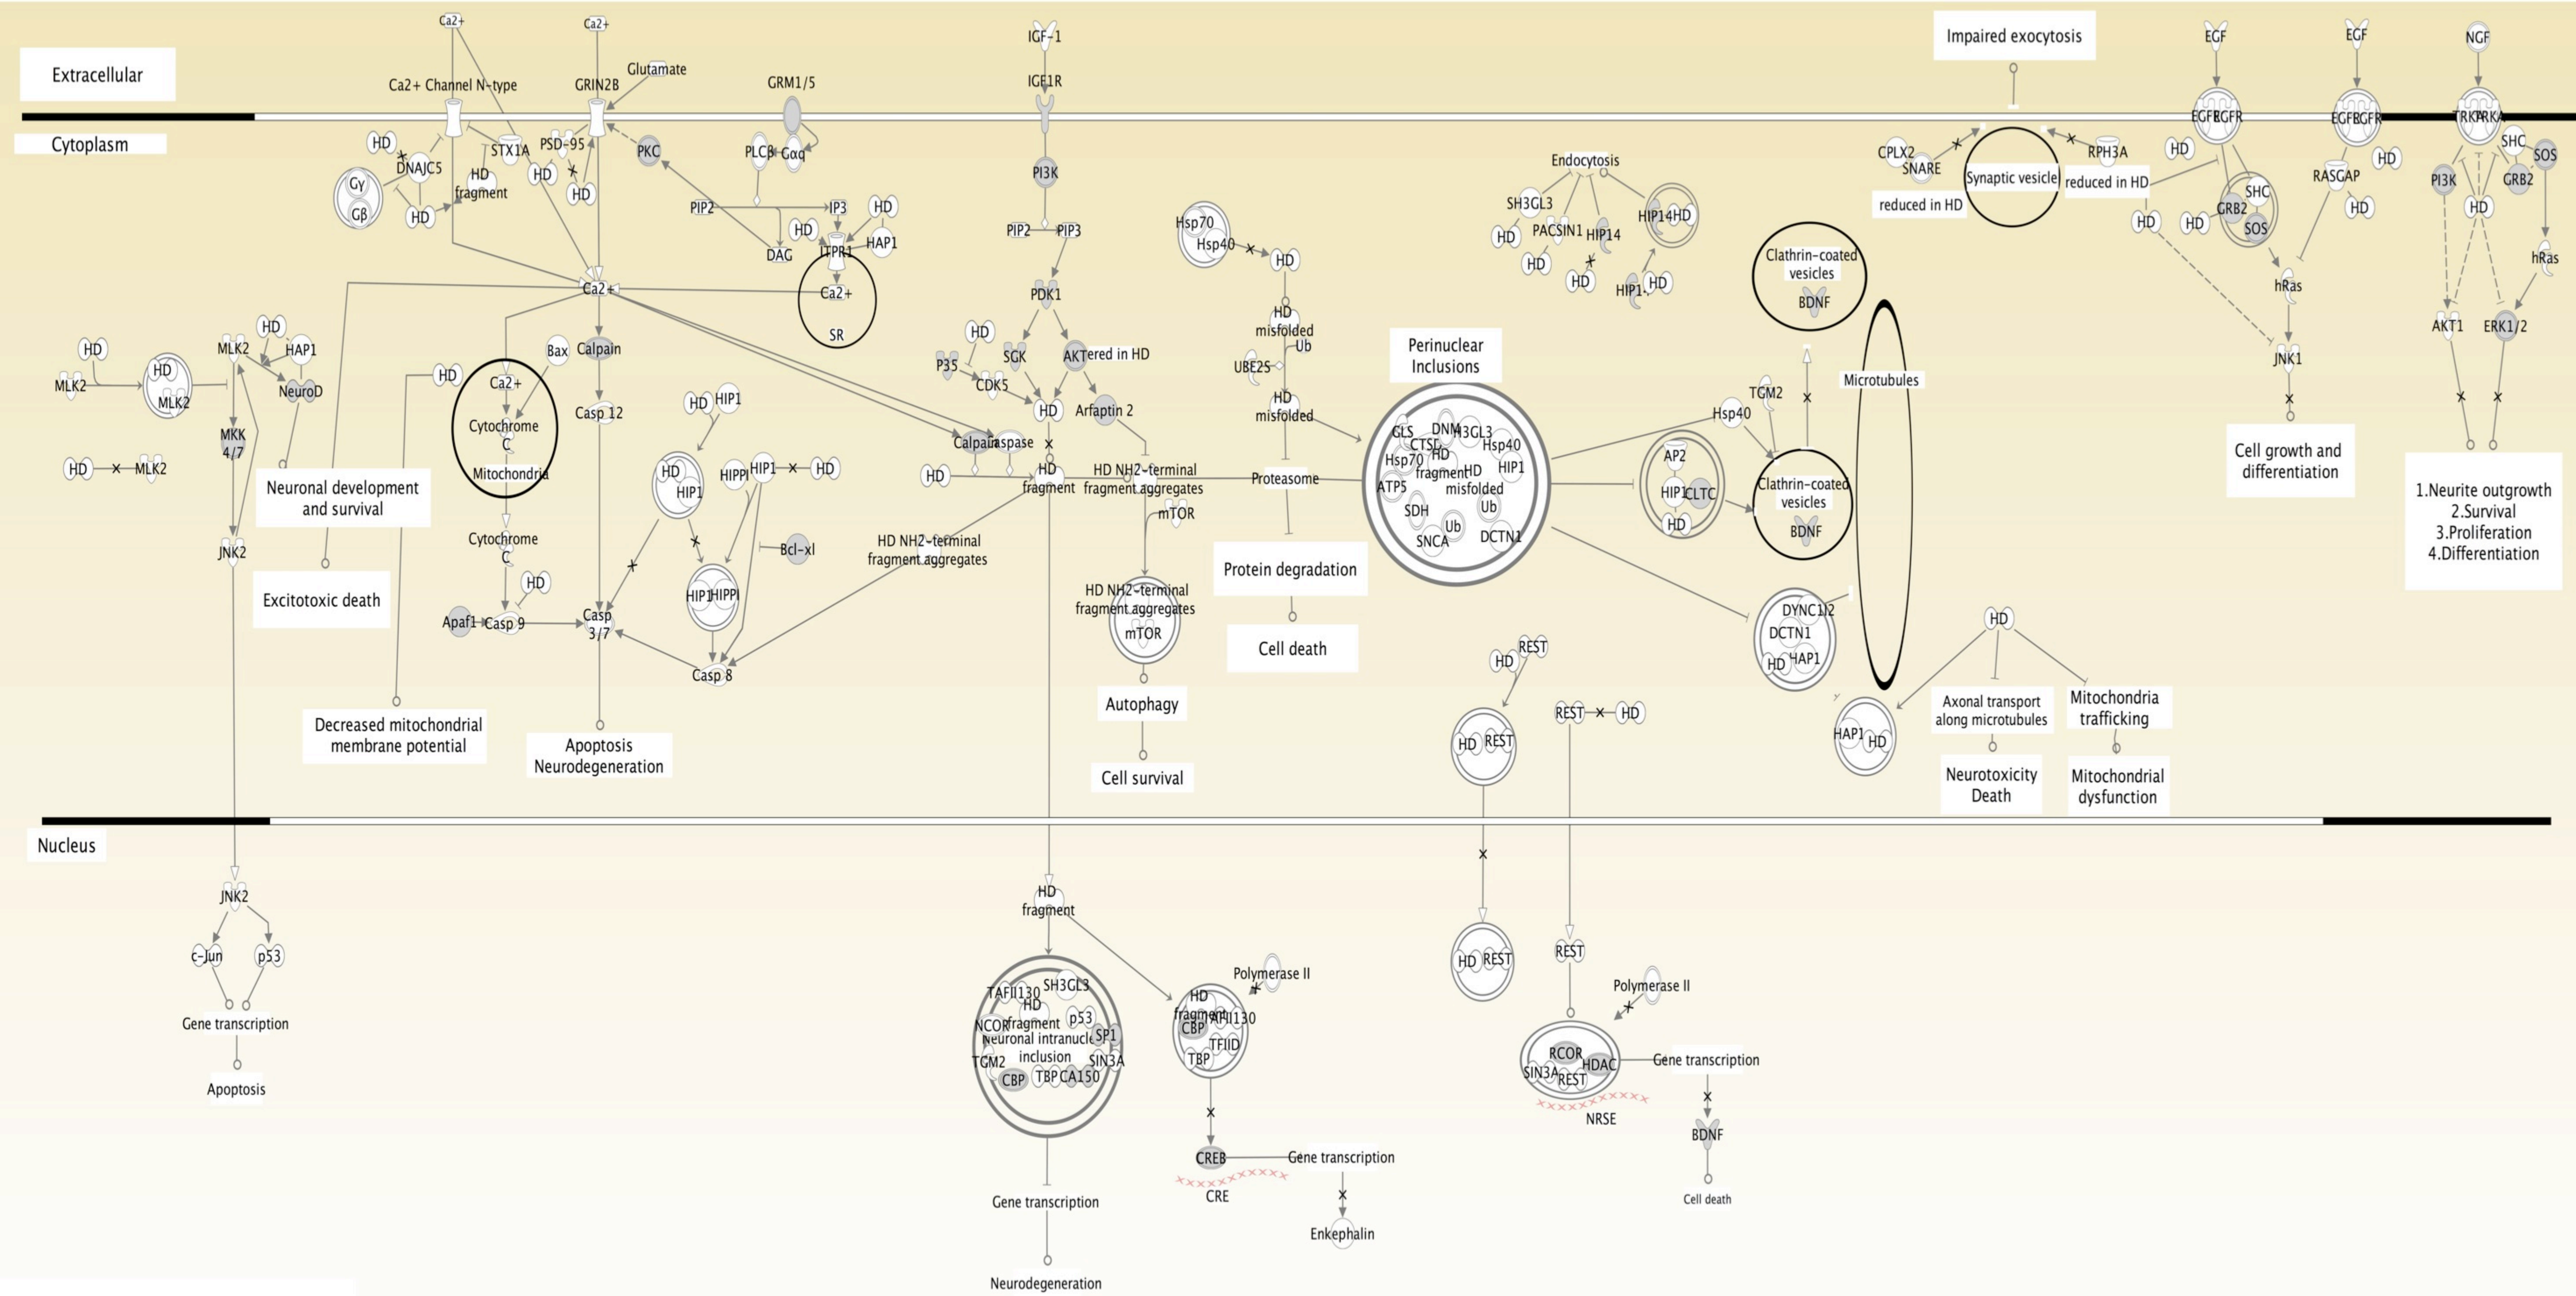

Supplement: supp_gkq575_FIGURE_S5.pdf [file supp_gkq575_FIGURE_S5.pdf]
